# Supplementary material for: Asthma and COVID-19 risk: a systematic review and meta-analysis
Source: PubMed Central journal article supplement — Eur Respir J. 2022 Mar 31;59(3):2101209. doi: 10.1183/13993003.01209-2021 (PMC8361304; doi:10.1183/13993003.01209-2021), 2022-03-31

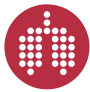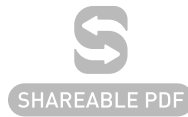

# Asthma and COVID-19 risk: a systematic review and meta-analysis

Anthony P. Sunjaya <sup>1,2</sup>, Sabine M. Allida<sup>1,2</sup>, Gian Luca Di Tanna <sup>1,2</sup> and Christine R. Jenkins <sup>1,2,3</sup>

<sup>1</sup>The George Institute for Global Health, Newtown, Australia. <sup>2</sup>Faculty of Medicine, The University of New South Wales, Sydney, Australia. <sup>3</sup>Concord Clinical School, Medical Education Centre, Concord Repatriation General Hospital, Sydney, Australia.

Corresponding author: Christine R. Jenkins ([christine.jenkins@sydney.edu.au](mailto:christine.jenkins@sydney.edu.au))

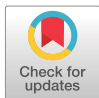

Shareable abstract (@ERSpublications)

**The risk of being infected with SARS-CoV-2 was reduced in patients with asthma compared to the non-asthma group. No significant differences in hospitalisation, ICU admission, ventilator use and mortality were found between groups.** <https://bit.ly/3izKB9h>

**Cite this article as:** Sunjaya AP, Allida SM, Di Tanna GL, *et al.* Asthma and COVID-19 risk: a systematic review and meta-analysis. *Eur Respir J* 2022; 59: 2101209 [DOI: 10.1183/13993003.01209-2021].

This single-page version can be shared freely online.

Copyright ©The authors 2022.

This version is distributed under the terms of the Creative Commons Attribution Non-Commercial Licence 4.0. For commercial reproduction rights and permissions contact [permissions@ersnet.org](mailto:permissions@ersnet.org)

Received: 27 April 2021  
Accepted: 2 Aug 2021

## Abstract

**Background** Individual case series and cohort studies have reported conflicting results in people with asthma on the vulnerability to and risk of mortality from coronavirus disease 2019 (COVID-19).

**Research question** Are people with asthma at a higher risk of being infected or hospitalised or poorer clinical outcomes from COVID-19?

**Methods** A systematic review and meta-analysis based on five main databases including the World Health Organization COVID-19 database between 1 December 2019 and 11 July 2021 on studies with a control (non-asthma) group was conducted. Prevalence and risk ratios were pooled using Sidik–Jonkman random-effects meta-analyses.

**Findings** 51 studies with an 8.08% (95% CI 6.87–9.30%) pooled prevalence of people with asthma among COVID-19 positive cases. The risk ratios were 0.83 (95% CI 0.73–0.95,  $p=0.01$ ) for acquiring COVID-19; 1.18 (95% CI 0.98–1.42,  $p=0.08$ ) for hospitalisation; 1.21 (95% CI 0.97–1.51,  $p=0.09$ ) for intensive care unit (ICU) admission; 1.06 (95% CI 0.82–1.36,  $p=0.65$ ) for ventilator use; and 0.94 (95% CI 0.76–1.17,  $p=0.58$ ) for mortality for people with asthma. Subgroup analyses by continent revealed a significant difference in risk of acquiring COVID-19, ICU admission, ventilator use and death between the continents.

**Interpretation** The risk of being infected with severe acute respiratory syndrome coronavirus 2 was reduced compared to the non-asthma group. No statistically significant differences in hospitalisation, ICU admission and ventilator use were found between groups. Subgroup analyses showed significant differences in outcomes from COVID-19 between America, Europe and Asia. Additional studies are required to confirm this risk profile, particularly in Africa and South America, where few studies originate.

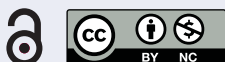

Supplement: ERJ-01209-2021.Shareable.pdf [file ERJ-01209-2021.Shareable.pdf]
