# Supplementary material for: Asthma and COVID-19 risk: a systematic review and meta-analysis
Source: PubMed Central journal article supplement — Eur Respir J. 2022 Mar 31;59(3):2101209. doi: 10.1183/13993003.01209-2021 (PMC8361304; doi:10.1183/13993003.01209-2021), 2022-03-31
Supplement: ERJ-01209-2021.Supplement.pdf [file ERJ-01209-2021.Supplement.pdf]

## SUPPLEMENTARY INFORMATION

### Asthma and Coronavirus Disease 2019 Risk: A systematic review and meta-analysis

Table S1. Summary of Prevalence and Risk for COVID-19 among asthmatics in previous systematic reviews and meta-analyses

| Study               | Period            | Sample Size                       | Prevalence <sup>#</sup><br>% (95% CI)      | Risk Ratio except where stated (95% CI) |                                   |                               |                                   |                                                        |                                        |
|---------------------|-------------------|-----------------------------------|--------------------------------------------|-----------------------------------------|-----------------------------------|-------------------------------|-----------------------------------|--------------------------------------------------------|----------------------------------------|
|                     |                   |                                   |                                            | Acquiring                               | Hospital                          | ICU                           | MV                                | ICU + MV                                               | Death                                  |
| Broadhurst et al[1] | To 7 May 2020     | 30,496                            | 6.8 (3.7–10.7)                             |                                         |                                   |                               |                                   |                                                        |                                        |
| Sunjaya et al[2]    | To 26 May 2020    | 587,280                           | 7.46% (6.25–8.67)                          | 0.86 (0.80–0.94; p < 0.0001)            | 0.87 (0.77–0.99, p = 0.03)        | 1.19 (0.93–1.53, p=0.16)      | 1.16 (0.83–1.63, p=0.39)          | 0.87 (0.94–1.37, p = 0.19)                             | 0.87 (0.68–1.10, p = 0.25)             |
| Mendes et al[3]     | To June 2020      | 161,271                           | 1.6%                                       |                                         |                                   |                               |                                   |                                                        |                                        |
| Hussein et al[4]    | To 15 July 2020   | 107,983                           | 11.2% (9.1%–13.3%) (Only hospital studies) |                                         | 0.94 (0.84–1.04, p=0.074)         | 1.64 (0.67–3.97, p=0.27)      | 1.27 (95%CI = 1.02–1.58, p=0.030) |                                                        | 0.80 (0.65–0.97, p=0.026)              |
| Liu et al[5]        | To 18 August 2020 | 410,382                           | 1.1% to 16.9%                              |                                         | 1.15; 95% CI, 0.92–1.43, P = 0.19 | 1.19; 95% CI, 0.92–1.54, 0.17 | 0.91; 95% CI, 0.71–1.17; P = 0.42 |                                                        | 0.90; 95% CI, 0.73–1.11; p = 0.31      |
| Wang et al[6]       | To 1 Sept 2020    | 32,187                            |                                            |                                         |                                   |                               |                                   | Severe COVID-19 OR = 1.09, 95% CI: 0.79– 1.51, P = .61 | OR = 0.84, 95% CI: 0.58– 1.23, P = .37 |
| Shi et al[7]        | To 20 Sept 2020   | 403,392                           | 8.3% (95% CI 7.6–9.0%)                     |                                         |                                   |                               |                                   | Combined with death 0.91 (0.78–1.06, P < 0.001)        | 0.80 (0.74–0.86, p=0.13)               |
| Terry et al[8]      | To Dec 2020       | 878,239 (hospitalized, severe and | 10.0% (95% CI, 8.0–12.2%)                  |                                         | 1.06 (0.94–1.19); P=              |                               |                                   | 1.18 (0.98–1.42); P=                                   | 0.89 (0.77–1.02); P= 0.09              |

|  |  |                            |                                                        |  |      |  |  |      |  |
|--|--|----------------------------|--------------------------------------------------------|--|------|--|--|------|--|
|  |  | mortality groups combined) | (Hospitalised) 9.5% (95% CI, 8.0–11.0%) (In community) |  | 0.37 |  |  | 0.07 |  |
|--|--|----------------------------|--------------------------------------------------------|--|------|--|--|------|--|

\*ICU – Intensive Care Unit; MV – Mechanical Ventilation

#Prevalence among COVID-19 positive cases

Table S2. Study Quality Assessment

| Study                   | Selection Bias | Comparability | Exposure | Total Score | Quality |
|-------------------------|----------------|---------------|----------|-------------|---------|
| Ahlstrom et al[9]       | 4              | 2             | 3        | 9           | High    |
| Almazeedi et al[10]     | 4              | 2             | 3        | 9           | High    |
| Arslan et al[11]        | 3              | 2             | 3        | 8           | High    |
| Ashinyo et al[12]       | 3              | 1             | 3        | 7           | High    |
| Aveyard et al[13]       | 3              | 2             | 3        | 8           | High    |
| Baumer et al[14]        | 3              | 2             | 3        | 8           | High    |
| Bergman et al[15]       | 4              | 2             | 3        | 9           | High    |
| Beurnier et al[16]      | 4              | 2             | 3        | 9           | High    |
| Calmes et al[17]        | 4              | 2             | 3        | 9           | High    |
| Castilla et al[18]      | 4              | 2             | 3        | 9           | High    |
| Chhiba et al[19]        | 4              | 2             | 3        | 9           | High    |
| Choi et al[20]          | 4              | 2             | 3        | 9           | High    |
| Dennis et al[21]        | 4              | 2             | 3        | 9           | High    |
| Eggert et al[22]        | 4              | 2             | 3        | 9           | High    |
| Emami et al[23]         | 3              | 2             | 3        | 7           | High    |
| Ferastraoaru et al[24]  | 4              | 2             | 3        | 9           | High    |
| Fong et al[25]          | 4              | 2             | 3        | 9           | High    |
| Garcia-Pachon et al[26] | 3              | 2             | 3        | 8           | High    |
| Green et al[27]         | 4              | 2             | 3        | 9           | High    |
| Guan et al[28]          | 4              | 2             | 3        | 9           | High    |
| Gude-Sampedro et al[29] | 4              | 2             | 3        | 9           | High    |
| Gupta et al[30]         | 3              | 1             | 2        | 6           | Medium  |
| Hansen et al[31]        | 4              | 2             | 3        | 9           | High    |
| Ho et al[32]            | 4              | 2             | 3        | 9           | High    |
| Je et al[33]            | 3              | 1             | 3        | 7           | High    |
| Kim et al[34]           | 4              | 2             | 3        | 9           | High    |
| Kipourou et al[35]      | 4              | 2             | 3        | 9           | High    |

|                             |   |   |   |   |        |
|-----------------------------|---|---|---|---|--------|
| Lee et al[36]               | 4 | 2 | 3 | 9 | High   |
| Lemus Calderon et al[37]    | 4 | 2 | 3 | 9 | High   |
| Liao et al[38]              | 4 | 2 | 3 | 9 | High   |
| Lieberman-Cribbin et al[39] | 4 | 1 | 3 | 8 | High   |
| Lombardi et al[40]          | 4 | 2 | 3 | 9 | High   |
| Louie et al[41]             | 3 | 2 | 3 | 8 | High   |
| Lovinsky-Desir et al[42]    | 4 | 2 | 3 | 9 | High   |
| Martos-Benitez et al[43]    | 4 | 2 | 3 | 9 | High   |
| Mash et al[44]              | 4 | 1 | 3 | 8 | High   |
| Mather et al[45]            | 3 | 1 | 3 | 7 | High   |
| Murillo-Zamora et al[46]    | 4 | 2 | 3 | 9 | High   |
| Nystad et al[47]            | 4 | 0 | 3 | 7 | High   |
| Patone et al[48]            | 4 | 2 | 3 | 9 | High   |
| Robinson et al[49]          | 4 | 2 | 3 | 8 | High   |
| Rosenthal et al[50]         | 4 | 2 | 3 | 8 | High   |
| Salacup et al[51]           | 3 | 2 | 3 | 8 | High   |
| Schonfeld et al[52]         | 4 | 2 | 3 | 9 | High   |
| Shah et al[53]              | 3 | 2 | 3 | 8 | High   |
| Tutiya et al[54]            | 3 | 1 | 3 | 7 | High   |
| Valverde-Monge et al[55]    | 4 | 2 | 3 | 9 | High   |
| Wang et al[56]              | 3 | 2 | 3 | 8 | High   |
| Yang et al[57]              | 4 | 2 | 3 | 9 | High   |
| Yordanov et al[58]          | 2 | 1 | 3 | 6 | Medium |
| Zhang et al[59]             | 3 | 2 | 3 | 8 | High   |

**Table S3- Assessment of Publication Bias**

| Outcomes                                                       | Egger Test (P-value) |
|----------------------------------------------------------------|----------------------|
| Proportion of COVID-19 among asthmatics                        | <0.0001              |
| Risk of acquiring COVID-19                                     | 0.9730               |
| Risk of hospitalisation from COVID-19                          | 0.0199               |
| Risk of requiring admission to ICU                             | 0.6228               |
| Risk of requiring admission to ICU then mechanical ventilation | 0.2702               |
| Risk of mortality                                              | 0.2835               |

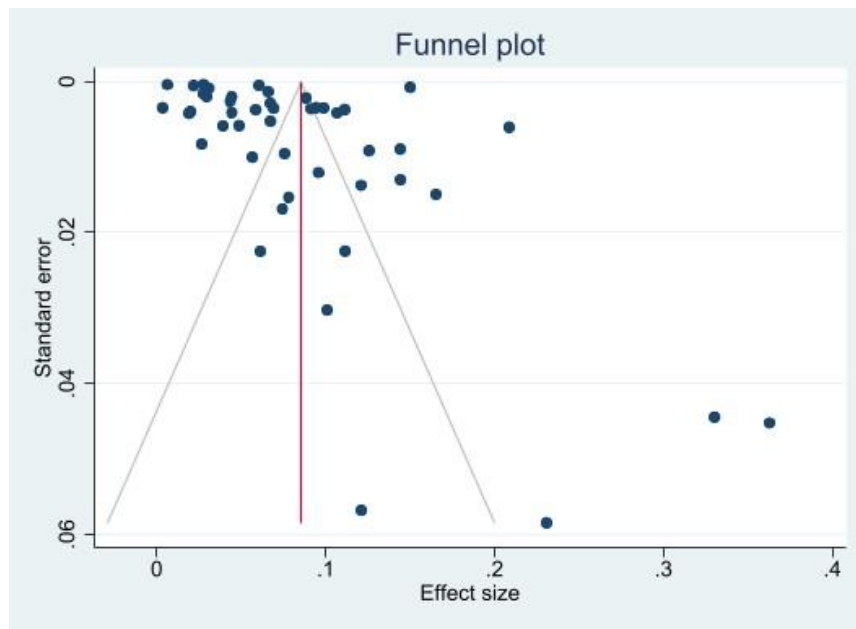

Figure S1. Proportion of COVID-19 among asthmatics

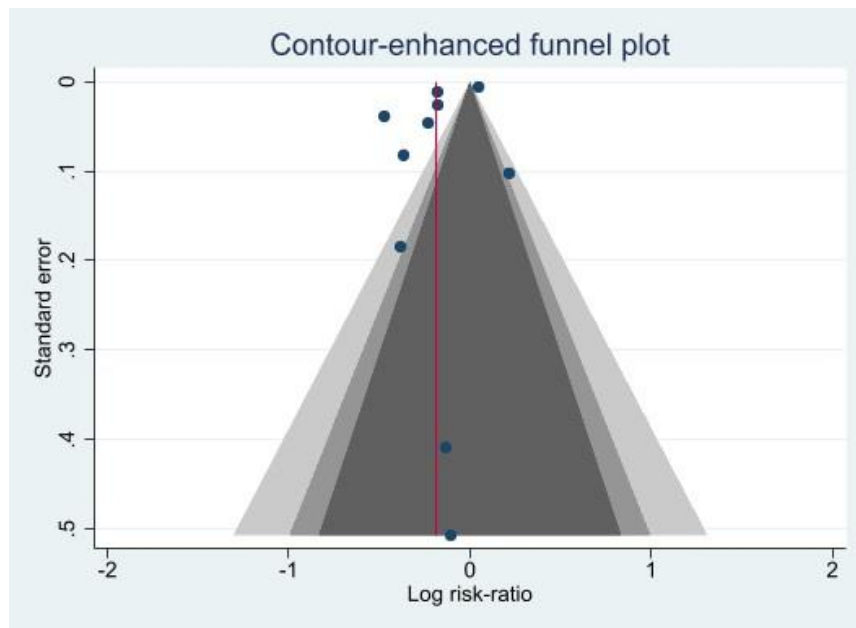

Figure S2. Risk of acquiring COVID-19

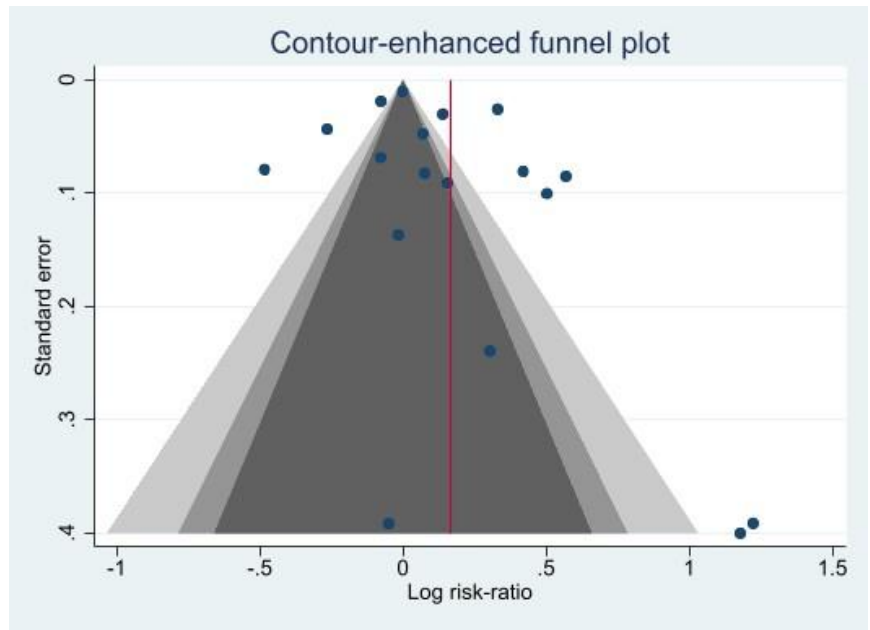

Figure S3. Risk of hospitalisation from COVID-19

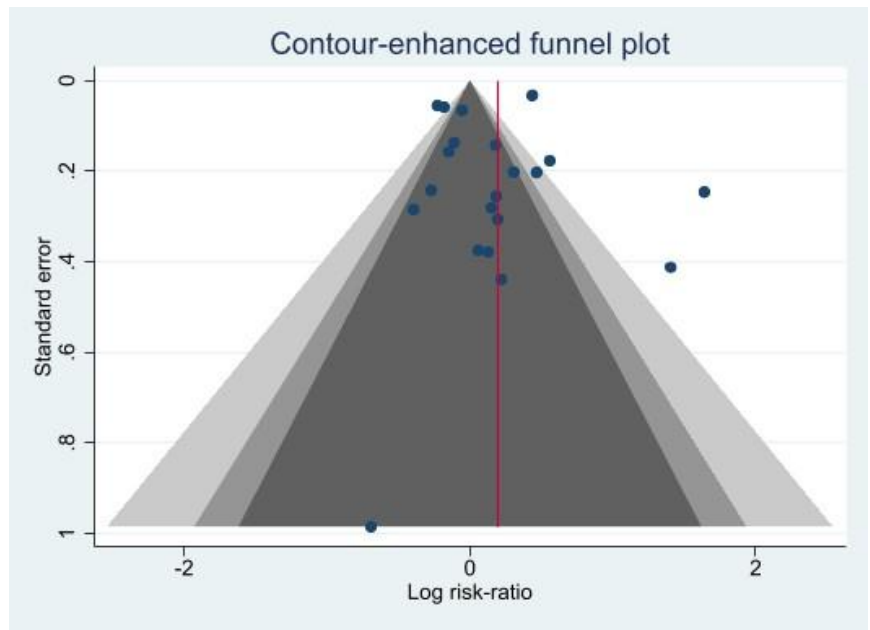

Figure S4. Risk of requiring admission to ICU

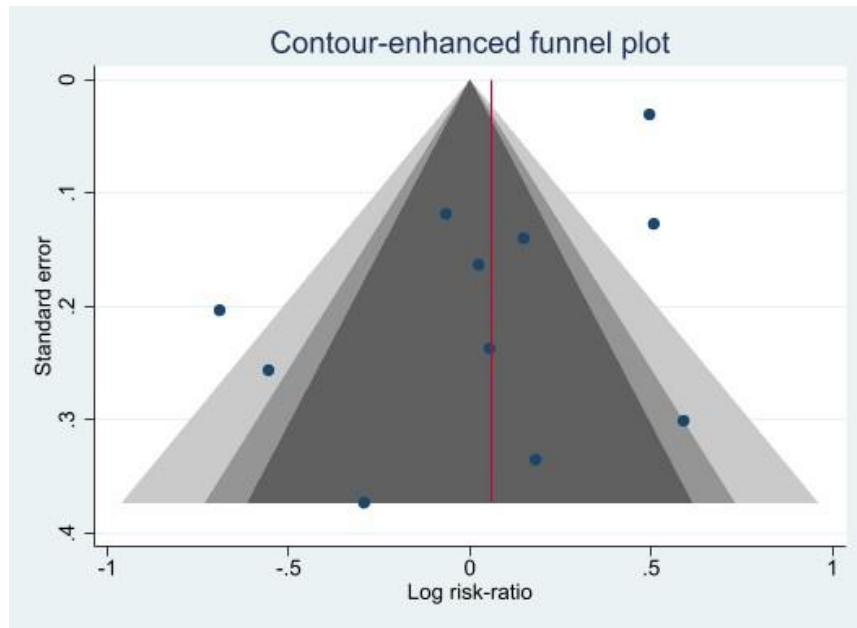

Figure S5. Risk of requiring admission to ICU then mechanical ventilation

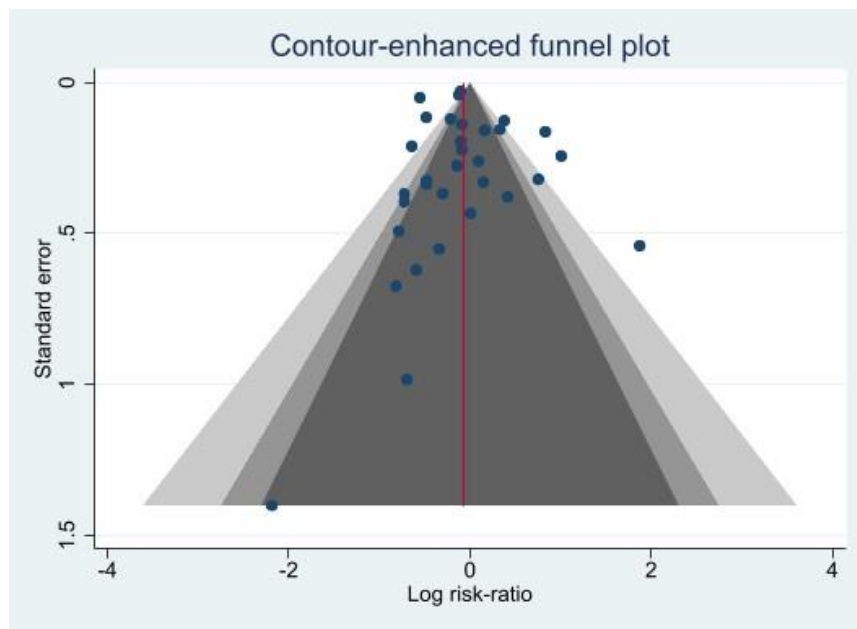

Figure S6. Risk of mortality

## References

1. Broadhurst, R., et al., *Asthma in COVID-19 Hospitalizations: An Overestimated Risk Factor?* Ann Am Thorac Soc, 2020. **17**(12): p. 1645-1648.
2. Sunjaya, A.P., et al., *Asthma and risk of infection, hospitalisation, ICU admission and mortality from COVID-19: Systematic review and meta-analysis.* J Asthma, 2021: p. 1-22.
3. Mendes, N.F., et al., *Asthma and COVID-19: a systematic review.* Allergy Asthma Clin Immunol, 2021. **17**(1): p. 5.
4. Wark, P.A.B., et al., *ACE2 expression is elevated in airway epithelial cells from older and male healthy individuals but reduced in asthma.* Respiriology, 2021.
5. Liu, S., et al., *Prevalence of Comorbid Asthma and Related Outcomes in COVID-19: A Systematic Review and Meta-Analysis.* J Allergy Clin Immunol Pract, 2021. **9**(2): p. 693-701.
6. Wang, Y., et al., *The relationship between severe or dead COVID-19 and asthma: A meta-analysis.* Clin Exp Allergy, 2021. **51**(2): p. 354-359.
7. Shi, L., et al., *Asthma in patients with coronavirus disease 2019: a systematic review and meta-analysis.* Annals of Allergy, Asthma & Immunology, 2021.
8. Terry, P.D., R.E. Heidel, and R. Dhand, *Asthma in Adult Patients with COVID-19. Prevalence and Risk of Severe Disease.* Am J Respir Crit Care Med, 2021. **203**(7): p. 893-905.
9. Ahlstrom, B., et al., *The swedish covid-19 intensive care cohort: Risk factors of ICU admission and ICU mortality.* Acta Anaesthesiol Scand, 2021.
10. Almazeedi, S., et al., *Characteristics, risk factors and outcomes among the first consecutive 1096 patients diagnosed with COVID-19 in Kuwait.* EClinicalMedicine, 2020.
11. Arslan, Y., et al., *The Boundaries Between Survival and Non-Survival at COVID-19: Experience of Tertiary Care Pandemic Hospital.* Int J Clin Pract, 2021.
12. Ashinyo, M.E., et al., *Clinical characteristics, treatment regimen and duration of hospitalization among COVID-19 patients in Ghana: a retrospective cohort study.* Pan Afr Med J, 2020.
13. Aveyard, P., et al., *Association between pre-existing respiratory disease and its treatment, and severe COVID-19: a population cohort study.* Lancet Respir Med, 2021.
14. Baumer, T., et al., *Epidemiology of the First Wave of COVID-19 ICU Admissions in South Wales- The Interplay Between Ethnicity and Deprivation.* Front Med (Lausanne), 2020.
15. Bergman, J., et al., *Risk factors for COVID-19 diagnosis, hospitalization, and subsequent all-cause mortality in Sweden: a nationwide study.* Eur J Epidemiol, 2021. **36**(3): p. 287-298.
16. Beurnier, A., et al., *Characteristics and outcomes of asthmatic patients with COVID-19 pneumonia who require hospitalisation.* Eur Respir J, 2020.
17. Doriane, C., et al., *Asthma and COPD are not risk factors for ICU stay and death in case of SARS-CoV-2 infection.* J Allergy Clin Immunol Pract, 2020.
18. Castilla, J., et al., *Risk Factors of Infection, Hospitalization and Death from SARS-CoV-2: A Population-Based Cohort Study.* J Clin Med, 2021. **10**(12).
19. Chhiba, K.D., et al., *Prevalence and characterization of asthma in hospitalized and nonhospitalized patients with COVID-19.* J Allergy Clin Immunol, 2020.
20. Choi, Y.J., et al., *Effect of Asthma and Asthma Medication on the Prognosis of Patients with COVID-19.* Eur Respir J, 2020.
21. Dennis, J.M., et al., *Type 2 Diabetes and COVID-19-Related Mortality in the Critical Care Setting: A National Cohort Study in England, March-July 2020.* Diabetes Care, 2021. **44**(1): p. 50-57.
22. Eggert, L.E., et al., *Asthma phenotypes, associated comorbidities, and long-term symptoms in COVID-19.* Allergy, 2021.
23. Emami, A., et al., *Survival rate in hypertensive patients with COVID-19.* Clin Exp Hypertens, 2020.

24. Ferastroaaru, D., et al., *Eosinophilia in Asthma Patients Is Protective Against Severe COVID-19 Illness*. J Allergy Clin Immunol Pract, 2021.
25. Fong, W.C.G., et al., *Asthma did not increase in-hospital COVID-19-related mortality in a tertiary UK hospital*. Clin Exp Allergy, 2021.
26. Garcia-Pachon, E., et al., *Asthma prevalence in patients with SARS-CoV-2 infection detected by RT-PCR not requiring hospitalization*. Respir Med, 2020.
27. Green, I., et al., *COVID-19 Susceptibility in Bronchial Asthma*. J Allergy Clin Immunol Pract, 2021. **9**(2): p. 684-692 e1.
28. Guan, W.J., et al., *Chronic Respiratory Diseases and the Outcomes of COVID-19: A Nationwide Retrospective Cohort Study of 39,420 Cases*. J Allergy Clin Immunol Pract, 2021.
29. Gude-Sampedro, F., et al., *Development and validation of a prognostic model based on comorbidities to predict COVID-19 severity: a population-based study*. Int J Epidemiol, 2021. **50**(1): p. 64-74.
30. Gupta, R., et al., *Higher comorbidities and early death in hospitalized African-American patients with Covid-19*. BMC Infect Dis, 2021. **21**(1): p. 78.
31. Hansen, E.S.H., et al., *Severe outcomes of COVID-19 among patients with COPD and asthma*. ERJ Open Res, 2021.
32. Ho, K.S., et al., *The relationship between asthma, eosinophilia, and outcomes in coronavirus disease 2019 infection*. Ann Allergy Asthma Immunol, 2021.
33. Je, D., et al., *Demographics, clinical characteristics and outcomes among 197 patients with COVID-19 in the Gold Coast area*. Intern Med J, 2021.
34. Kim, S., et al., *Characterization of asthma and risk factors for delayed SARS-CoV-2 clearance in adult COVID-19 inpatients in Daegu*. Allergy, 2020.
35. Kipourou, D.K., et al., *Probabilities of ICU admission and hospital discharge according to patient characteristics in the designated COVID-19 hospital of Kuwait*. BMC Public Health, 2021. **21**(1): p. 799.
36. Lee, S.C., et al., *Impact of comorbid asthma on severity of coronavirus disease (COVID-19)*. Sci Rep, 2020. **10**(1): p. 21805.
37. Lemus Calderon, J.A., et al., *Differentiating characteristics of patients with asthma in the severe acute respiratory syndrome coronavirus 2 infection*. Ann Allergy Asthma Immunol, 2020.
38. Liao, S.-Y., et al., *Association of inhaled and systemic corticosteroid use with Coronavirus Disease 2019 (COVID-19) test positivity in patients with chronic pulmonary diseases*. Respir Med, 2021.
39. Lieberman-Cribbin, W., et al., *The Impact of Asthma on Mortality in Patients With COVID-19*. Chest, 2020.
40. Lombardi, C., et al., *Clinical course and outcomes of patients with asthma hospitalized for severe acute respiratory syndrome coronavirus 2 pneumonia: A single-center, retrospective study*. Ann Allergy Asthma Immunol, 2020.
41. Louie, T., et al., *Respiratory failure, clinical course and community management of COVID-19 patients in a large Australian cohort*. Intern Med J, 2021. **51**(3): p. 334-340.
42. Lovinsky-Desir, S., et al., *Asthma among hospitalized patients with COVID-19 and related outcomes*. J Allergy Clin Immunol, 2020.
43. Martos-Benitez, F.D., C.D. Soler-Morejon, and D. Garcia-Del Barco, *Chronic comorbidities and clinical outcomes in patients with and without COVID-19: a large population-based study using national administrative healthcare open data of Mexico*. Intern Emerg Med, 2021.
44. Mash, R.J., et al., *Evaluation of patient characteristics, management and outcomes for COVID-19 at district hospitals in the Western Cape, South Africa: descriptive observational study*. BMJ Open, 2021.



45. Mather, J.F., W. Mosleh, and R.G. McKay, *The Impact of Asthma on In-Hospital Outcomes of COVID-19 Patients*. J Asthma, 2021.
46. Murillo-Zamora, E. and C.M. Hernandez-Suarez, *Survival in adult inpatients with COVID-19*. Public Health, 2021. **190**: p. 1-3.
47. Nystad, W., et al., *Underlying conditions in adults with COVID-19*. Tidsskr Nor Laegeforen, 2020.
48. Patone, M., et al., *Mortality and critical care unit admission associated with the SARS-CoV-2 lineage B.1.1.7 in England: an observational cohort study*. Lancet Infect Dis, 2021.
49. Robinson, L.B., et al., *COVID-19 severity in asthma patients: a multi-center matched cohort study*. J Asthma, 2021: p. 1-14.
50. Rosenthal, J.A., et al., *Asthma Is Associated with Increased Risk of Intubation but Not Hospitalization or Death in COVID-19*. Ann Allergy Asthma Immunol, 2020.
51. Salacup, G., et al., *Characteristics and clinical outcomes of COVID-19 patients in an underserved-inner city population: A single tertiary center cohort*. J Med Virol, 2020.
52. Schonfeld, D., et al., *Clinical presentation and outcomes of the first patients with COVID-19 in Argentina: Results of 207079 cases from a national database*. PLoS One, 2021. **16**(2): p. e0246793.
53. Shah, S.J., et al., *Clinical features, diagnostics, and outcomes of patients presenting with acute respiratory illness: A retrospective cohort study of patients with and without COVID-19*. EClinicalMedicine, 2020. **27**: p. 100518.
54. Tutiya, C., et al., *Risk factors for severe and critical Covid-19 in pregnant women in a single center in Brazil*. J Matern Fetal Neonatal Med, 2021: p. 1-4.
55. Valverde-Monge, M., et al., *Eosinophils and Chronic Respiratory Diseases in Hospitalized COVID-19 Patients*. Front Immunol, 2021.
56. Wang, J., et al., *Clinical features and risk factors for severe inpatients with COVID-19: A retrospective study in China*. PLOS ONE, 2020. **15**(12): p. e0244125.
57. Yang, J.M., et al., *Allergic disorders and susceptibility to and severity of COVID-19: A nationwide cohort study*. J Allergy Clin Immunol, 2020.
58. Yordanov, Y., et al., *Clinical characteristics and factors associated with hospital admission or death in 43,103 adult outpatients with COVID-19 managed with the Covidom telesurveillance solution: a prospective cohort study*. Clin Microbiol Infect, 2021.
59. Zhang, J.J., et al., *Distinct characteristics of COVID-19 patients with initial rRT-PCR-positive and rRT-PCR-negative results for SARS-CoV-2*. Allergy, 2020. **75**(7): p. 1809-1812.
